# Supplementary material for: It’s never too early to get it Right: A conserved role for the cytoskeleton in left-right asymmetry
Source: PubMed Central journal article supplement — Commun Integr Biol. 2013 Nov 14;6(6):e27155. doi: 10.4161/cib.27155 (PMC3912007; doi:10.4161/cib.27155), 2013-11-14
Supplement: cib-6-e27155-s01.pdf [file cib-6-e27155-s01.pdf]

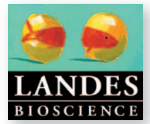

## **Supplemental Material to:**

**Laura N Vandenberg, Joan M Lemire, and Michael Levin\***

**It's never too early to get it right: A conserved role for the  
cytoskeleton in left-right asymmetry**

**Communicative & Integrative Biology 2013; 6(6)**

**<http://dx.doi.org/10.4161/cib.27155>**

**<http://www.landesbioscience.com/journals/cib/article/27155>**

## **Supplemental Material to:**

**Cyril C Grueter\***

**No effect of inter-group conflict on  
within-group harmony in non-human primates**

**Communicative & Integrative Biology 2013; 6(6)**

**<http://dx.doi.org/10.4161/cib.26801>**

**<http://www.landesbioscience.com/journals/cib/article/26801>**

## Supplementary File

| Species                               | Grooming (%) | Home range overlap (%) | Source                                                       | Notes                                                                                                                                  |
|---------------------------------------|--------------|------------------------|--------------------------------------------------------------|----------------------------------------------------------------------------------------------------------------------------------------|
| <i>Lemur catta</i>                    | 11           | 42                     | (Jolly et al. 1993; Sussman 1977)                            |                                                                                                                                        |
| <i>Propithecus verreauxi</i>          | 2            | 40.8                   | (Benadi et al. 2008; Lewis 2009)                             |                                                                                                                                        |
| <i>Cebus olivaceus</i>                | 1.85         | 90                     | (de Ruiter 1986)                                             | Home range overlap estimated from Fig 1                                                                                                |
| <i>Alouatta guariba</i>               | 2.55         | 16.5                   | (Agostini et al. 2010), Agostini in (Grueter et al. 2013)    |                                                                                                                                        |
| <i>Alouatta caraya</i>                | 1.15         | 22                     | (Agostini et al. 2010), Agostini in (Grueter et al. 2013)    |                                                                                                                                        |
| <i>Brachyteles hypoxanthus</i>        | 0            | 46                     | (Strier 1987; Strier 1992)                                   |                                                                                                                                        |
| <i>Presbytis femoralis/melalophos</i> | 0            | 79                     | (Bennett 1983)                                               | <i>Presbytis siamensis</i> in (Grueter et al. 2013)                                                                                    |
| <i>Presbytis thomasi</i>              | 1.3          | 40.5                   | (Grueter and van Schaik 2010; van Oijen 1992)                |                                                                                                                                        |
| <i>Presbytis potenziani</i>           | 0.1          | 28                     | (Sangchantr 2004)                                            |                                                                                                                                        |
| <i>Presbytis rubicunda</i>            | 0            | 10                     | (Davies 1984)                                                |                                                                                                                                        |
| <i>Trachypithecus leucocephalus</i>   | 11.5         | 16.2                   | (Li and Rogers 2005; Li and Rogers 2004)                     |                                                                                                                                        |
| <i>Trachypithecus pileatus</i>        | 0.35         | 84                     | (Stanford 1991)                                              |                                                                                                                                        |
| <i>Semnopithecus entellus</i>         | 6            | 50                     | (Newton 1992)                                                |                                                                                                                                        |
| <i>Rhinopithecus bieti</i>            | 6.1          | 100                    | (Kirkpatrick 1996)                                           |                                                                                                                                        |
| <i>Rhinopithecus avunculus</i>        | 6.8          | 100                    | (Boonratana and Le 1998)                                     |                                                                                                                                        |
| <i>Pygathrix nigripes</i>             | 2.25         | 9.6                    | (Hoang 2007)                                                 | Mean overlap of 2 sites                                                                                                                |
| <i>Nasalis larvatus</i>               | 2.8          | 100                    | (Boonratana 1993)                                            |                                                                                                                                        |
| <i>Colobus polykomos</i>              | 0.7          | 4                      | Dasilva in (Dunbar 1991) and (Oates 1994)                    |                                                                                                                                        |
| <i>Colobus guereza</i>                | 6.175        | 73                     | (Fashing 2001; Oates 1977)                                   |                                                                                                                                        |
| <i>Colobus vellerosus</i>             | 1.345        | 81.5                   | (Teichroeb et al. 2003; Teichroeb and Sicotte 2009)          |                                                                                                                                        |
| <i>Ptilocolobus rufomitratu</i>       | 2.1          | 36                     | (Marsh 1981a; Marsh 1981b)                                   |                                                                                                                                        |
| <i>Ptilocolobus badius</i>            | 5.4          | 60                     | (Starin 1991)                                                |                                                                                                                                        |
| <i>Ptilocolobus kirkii</i>            | 7.03         | 30.86                  | (Siex 2003)                                                  |                                                                                                                                        |
| <i>Ptilocolobus tephrosceles</i>      | 4.5          | 99                     | (Struhsaker 1975; Struhsaker and Leland 1979)                |                                                                                                                                        |
| <i>Procolobus verus</i>               | 3.6          | 15                     | (Korstjens 2001), Noe and Korstjens in (Lehmann et al. 2007) | Home range overlap measures only overlap with one of the multiple groups that overlap study group's home range; home range overlap >14 |

|                                  |      |       |                                                                                                    |                                                                                                                                                                                 |
|----------------------------------|------|-------|----------------------------------------------------------------------------------------------------|---------------------------------------------------------------------------------------------------------------------------------------------------------------------------------|
| <i>Cercopithecus mitis</i>       | 8.06 | 12.2  | (Butynski 1990)                                                                                    |                                                                                                                                                                                 |
| <i>Cercopithecus ascanius</i>    | 5.6  | 5     | (Struhsaker 1980; Struhsaker and Leland 1979)                                                      | "very little overlap"                                                                                                                                                           |
| <i>Cercopithecus campbelli</i>   | 2.8  | 0     | (Buzzard 2004)                                                                                     |                                                                                                                                                                                 |
| <i>Cercopithecus diana</i>       | 2.5  | 8     | (Buzzard 2004)                                                                                     | Home range overlap estimated from Fig. 5.7                                                                                                                                      |
| <i>Chlorocebus aethiops</i>      | 6.8  | 5     | (Isbell and Young 1993)                                                                            | Overlap "minimal"                                                                                                                                                               |
| <i>Chlorocebus djamdjamensis</i> | 2.7  | 3.5   | (Mekonnen et al. 2010)                                                                             |                                                                                                                                                                                 |
| <i>Lophocebus albigena</i>       | 5.2  | 76    | (Chancellor and Isbell 2009; Waser 1976)                                                           |                                                                                                                                                                                 |
| <i>Macaca fuscata</i>            | 23.4 | 38    | (Agetsuma 1995; Maruhashi 1981; Maruhashi 1982; Maruhashi et al. 1998)                             | Home range overlap data from the same population, but not from the same group as grooming data were obtained                                                                    |
| <i>Macaca munzala</i>            | 12   | 10    | (Kumar et al. 2007)                                                                                | Home range overlap ca 10%                                                                                                                                                       |
| <i>Theropithecus gelada</i>      | 17.4 | 100   | (Iwamoto and Dunbar 1983)                                                                          |                                                                                                                                                                                 |
| <i>Papio papio</i>               | 8.3  | 15    | (Sharman 1981)                                                                                     |                                                                                                                                                                                 |
| <i>Papio ursinus</i>             | 10   | 75    | (Barrett et al. 1999; Whiten et al. 1987)                                                          | Same population, but home range overlap data from earlier study on possibly different groups                                                                                    |
| <i>Papio cynocephalus</i>        | 8.95 | 25    | (Bronikowski and Altmann 1996; Stacey 1986)                                                        | Same groups, but grooming and range overlap data not from exactly the same time; used % time socializing (which was essentially time spent grooming); home range overlap ca 25% |
| <i>Hylobates lar</i>             | 4    | 20.25 | (Bartlett 1999; Ellefson 1974)                                                                     | Ellefson: home range overlap "slight"                                                                                                                                           |
| <i>Hylobates klossii</i>         | 0    | 10    | (Whitten 1980)                                                                                     | Home range overlap "slight"                                                                                                                                                     |
| <i>Hylobates agilis</i>          | 0    | 24    | (Gittins 1980; Gittins and Raemaekers 1980)                                                        |                                                                                                                                                                                 |
| <i>Symphalangus syndactylus</i>  | 10   | 30    | (Chivers 1974; Gittins and Raemaekers 1980)                                                        | Same siamang group; home range overlap from Chivers; home range overlap = average of 2 groups                                                                                   |
| <i>Nomascus concolor</i>         | 1.71 | 10    | (Guan et al. 2013)                                                                                 |                                                                                                                                                                                 |
| <i>Hylobates pileatus</i>        | 5    | 25    | (Brockelman and Srikosamatara 1984; Srikosamatara 1984)                                            |                                                                                                                                                                                 |
| <i>Pan paniscus</i>              | 5.7  | 40    | (Thompson-Handler 1990; White 1992)                                                                |                                                                                                                                                                                 |
| <i>Pan troglodytes</i>           | 9.77 | 20.5  | (Boesch and Boesch-Achermann 2000; Huffman 1990; Nishida 1979; Willems et al. 2013; Wrangham 1977) | Wrangham: home range overlap "slight"                                                                                                                                           |
| <i>Gorilla gorilla</i>           | 0.09 | 100   | Doran, cited in (Lehmann et al. 2007), (Doran and McNeilage 2001 )                                 |                                                                                                                                                                                 |
| <i>Gorilla beringei</i>          | 2.49 | 74    | (Watts 1994; Watts 1998); KRC data in (Grueter et al. 2013)                                        | Group 5 shared 47% and group Nk shared 100% with other groups                                                                                                                   |

|                       |      |      |                                                                         |
|-----------------------|------|------|-------------------------------------------------------------------------|
| <i>Pongo pygmaeus</i> | 0.01 | 67.8 | (Knott et al. 2008; Mitra Setia et al. 2009; van Noordwijk et al. 2009) |
|-----------------------|------|------|-------------------------------------------------------------------------|

- Agetsuma N. 1995. Foraging strategies of Yakushima macaques (*Macaca fuscata yakui*). *International Journal of Primatology* 16:595-609.
- Agostini I, Holzmann I, and Di Bitetti MS. 2010. Are howler monkey species ecologically equivalent? Trophic niche overlap in syntopic *Alouatta guariba clamitans* and *Alouatta caraya*. *American Journal of Primatology* 72:173-186.
- Barrett L, Henzi SP, Weingrill T, Lycett JE, and Hill RA. 1999. Market forces predict grooming reciprocity in female baboons. *Proceedings of the Royal Society of London B* 266:665-670.
- Bartlett TQ. 1999. Feeding and ranging behavior of the white-handed gibbon (*Hylobates lar*) in Khao Yai National Park, Thailand. St. Louis: Washington University.
- Benadi G, Fichtel C, and Kappeler P. 2008. Intergroup relations and home range use in verreaux's sifaka (*Propithecus verreauxi*). *American Journal of Primatology* 70(10):956-965.
- Bennett E. 1983. The Banded Langur: Ecology of a Colobine in West Malaysian Rain-Forest [Ph.D. thesis]. Cambridge: Sidney Sussex College.
- Boesch C, and Boesch-Achermann H. 2000. *The Chimpanzees of the Tai Forest: Behavioural Ecology and Evolution*. New York: Oxford Univ Press. viii, 316 p.
- Boonratana R. 1993. *The Ecology and Behaviour of the Proboscis Monkey (Nasalis larvatus) in the Lower Kinabatangan, Sabah* Mahidol University
- Boonratana R, and Le XC. 1998. Preliminary observations of the ecology and behavior of the Tonkin snub-nosed monkey (*Rhinopithecus avunculus*) in Northern Vietnam. In: Jablonski NG, editor. *The Natural History of the Doucs and Snub-Nosed Monkeys*. Singapore: World Scientific Press. p 207-217.
- Brockelman WY, and Srikosamatara S. 1984. Maintenance and evolution of social structure in gibbons. In: Preuschoft H, Chivers DJ, Brockelman WY, and Creel N, editors. *The Lesser Apes: Evolutionary and Behavioural Biology*. Edinburgh: Edinburgh University Press. p 298-323.
- Bronikowski AM, and Altmann J. 1996. Foraging in a variable environment: Weather patterns and the behavioral ecology of baboons. *Behavioral Ecology and Sociobiology* 39:11-25.
- Butynski TM. 1990. Comparative ecology of blue monkeys (*Cercopithecus mitis*) in high- and low-density subpopulations. *Ecological Monographs* 60:1-26.
- Buzzard PJ. 2004. Interspecific competition among *Cercopithecus campbelli*, *Cercopithecus petaurista*, and *Cercopithecus diana* at Tai Forest, Cote d'Ivoire (Cote d'Ivoire). New York: Columbia.
- Chancellor R, and Isbell L. 2009. Female grooming markets in a population of gray-cheeked mangabeys (*Lophocebus albigena*). *Behavioral Ecology* 20:79-86.
- Chivers DJ. 1974. The siamang in Malaya: A field study of a primate in tropical rain forest. *Contributions to Primatology* 4:1-335.
- Davies AG. 1984. *An Ecological Study of the Red Leaf Monkey (Presbytis rubicunda) in the Dipterocarp Forest of Northern Borneo*. [Ph.D. dissertation]: University of Cambridge.
- de Ruiter JR. 1986. The influence of group size on predator scanning and foraging behaviour of wedged-capped capuchin monkeys (*Cebus olivaceus*). *Behaviour* 98:240-258.
- Doran D, and McNeillage A. 2001. Subspecific variation in gorilla behavior: the influence of ecological and social factors. In: Robbins M, Sicotte P, and Stewart K, editors. *Mountain gorillas: three decades of research at Karisoke*. Cambridge: Cambridge University Press. p 123-149

- Dunbar RIM. 1991. Functional significance of social grooming in primates. *Folia Primatologica* 57:121-131.
- Ellefson JO. 1974. A natural history of white-handed gibbons in the Malayan peninsula. *Gibbon and Siamang* 3:1-136.
- Fashing PJ. 2001. Activity and ranging patterns of guerezas in the Kakamega Forest: intergroup variation and implications for intragroup feeding competition *International Journal of Primatology* 22:549-577.
- Gittins SP. 1980. Territorial behavior in the agile gibbon. *International Journal of Primatology* 1:381-399.
- Gittins SP, and Raemaekers JJ. 1980. Siamang, lar and agile gibbons. *Malayan Forest Primates: Ten Years' Study in Tropical Rain Forest*. New York: Plenum Press. p 63-105.
- Grueter CC, Bissonnette A, Isler K, and van Schaik CP. 2013. Grooming and social cohesion in primates: implications for the evolution of language. *Evolution and Human Behavior* 34:61-68.
- Grueter CC, and van Schaik CP. 2010. Evolutionary determinants of modular societies in colobines. *Behavioral Ecology* 21:63-71.
- Guan Z-H, Huang B, Ning W-H, Ni Q-Y, Sun G-Z, and Jiang X-L. 2013. Significance of grooming behavior in two polygynous groups of Western black crested gibbons: implications for understanding social relationships among immigrant and resident group members. *American Journal of Primatology*.
- Hoang MD. 2007. Ecology and Conservation Status of the Black-Shanked Douc (*Pygathrix nigripes*) in Nui Cha and Phuoc Binh National Parks, Ninh Thuan Province, Vietnam [Ph.D. dissertation]: University of Queensland.
- Huffman MA. 1990. Some socio-behavioral manifestations of old age. *The Chimpanzees of the Mahale Mountains: Sexual and Life History Strategies*. Tokyo: University of Tokyo Press. p 237-255.
- Isbell LA, and Young TP. 1993. Social and ecological influences on activity budgets of vervet monkeys, and their implications for group living. *Behavioral Ecology and Sociobiology* 32:377-385.
- Iwamoto T, and Dunbar RIM. 1983. Thermoregulation, habitat quality and the behavioral ecology of gelada baboons. *Journal of Animal Ecology* 52:357-366.
- Jolly A, Rasamimanana HR, Kinnaird MF, O'Brien TG, Crowley HM, Harcourt CS, Gardner S, and Davidson JM. 1993. Territoriality in Lemur catta groups during the birth season at Berenty, Madagascar. In: Kappeler PM, and Ganzhorn JU, editors. *Lemur Social Systems and their Ecological Basis*. New York: Plenum Press. p 85-109.
- Kirkpatrick RC. 1996. Ecology and Behavior of the Yunnan Snub-Nosed Langur (*Rhinopithecus bieti*, Colobinae) [Ph.D. dissertation]. Davis: University of California.
- Knott C, Beaudrot L, Snaith T, White S, Tschauer H, and Planansky G. 2008. Female-female competition in Bornean orangutans. *International Journal of Primatology* 29:975-997.
- Korstjens AH. 2001. The mob, the secret sorority, and the phantoms. [PhD Dissertation]. Utrecht: Utrecht University
- Kumar RS, Mishra C, and Sinha A. 2007. Foraging ecology and time-activity budget of the Arunachal macaque *Macaca munzala* - a preliminary study. *Current Science* 93:532-539.
- Lehmann J, Korstjens AH, and Dunbar RIM. 2007. Group size, grooming and social cohesion in primates. *Animal Behaviour* 74:1617-1629.
- Lewis RJ. 2009. Grooming patterns in Verreaux's sifaka. *American Journal of Primatology* 72:254-261.
- Li Z, and Rogers M. 2005. Habitat quality and range use of white-headed langurs in Fusui, China. *Folia Primatologica* 76:185-195
- Li Z, and Rogers ME. 2004. Habitat quality and activity budgets of white-headed langurs in Fusui, China. *International Journal of Primatology* 25:41-54.

- Marsh C. 1981a. Time budget of Tana River red colobus. *Folia Primatologica* 35:30-50.
- Marsh CW. 1981b. Ranging behaviour and its relation to diet selection in Tana River red colobus (*Colobus badius rufomitratu*s). *Journal of Zoology* 195:473-492.
- Maruhashi T. 1981. Activity patterns of a troop of Japanese monkeys (*Macaca fuscata yakui*) on Yakushima Island, Japan. *Primates* 22:1-14.
- Maruhashi T. 1982. An ecological study of troop fissions of Japanese monkeys (*Macaca fuscata yakui*) on Yakushima Island, Japan. *Primates* 23:317-337.
- Maruhashi T, Saito C, and Agetsuma N. 1998. Home range structure and inter-group competition for land of Japanese macaques in evergreen and deciduous forests. *Primates* 39:291-301.
- Mekonnen A, Bekele A, Fashing PJ, Hemson G, and Atickem A. 2010. Diet, activity patterns, and ranging ecology of the Bale monkey (*Chlorocebus djamdjamensis*) in Odobullu Forest, Ethiopia. *International Journal of Primatology* 31:339-362.
- Mitra Setia T, Delgado RA, Utami Atmoko SS, Singleton I, and van Schaik CP. 2009. Social organization and male-female relationships. *Orangutans: Geographic Variation in Behavioral Ecology and Conservation*. New York: Oxford Univ Press. p 245-253.
- Newton P. 1992. Feeding and ranging patterns of forest hanuman langurs (*Presbytis entellus*). *International Journal of Primatology* 13:245-285.
- Nishida T. 1979. The social structure of chimpanzees of the Mahale Mountains. In: Hamburg DA, and McCown ER, editors. *Perspectives on Human Evolution*, vol 5: The Great Apes. Menlo Park, California: Benjamin/Cummings Publishing Co. p 73-121.
- Oates JF. 1977. The guereza and its food. *Primate Ecology: Studies of Feeding and Ranging Behaviour in Lemurs, Monkeys and Apes*. New York: Academic Press. p 275-321.
- Oates JF. 1994. The natural history of African colobines. In: Davies AG, and Oates JF, editors. *Colobine Monkeys: Their Ecology, Behaviour and Evolution*. Cambridge: Cambridge University Press. p 75-128.
- Sangchantr S. 2004. Social organization and ecology of Mentawai leaf monkeys (*Presbytis potenziani*). Columbia University
- Sharman M. 1981. Feeding, Ranging and Social Organization of the Guinea Baboon [Ph. D. thesis ]: University of St. Andrews.
- Siex KS. 2003. Effects of population compression on the demography, ecology, and behavior of the Zanzibar red colobus monkey (*Procolobus kirkii*) [PhD]: Duke University.
- Srikosamatara S. 1984. Ecology of pileated gibbons in south-east Thailand. *The Lesser Apes: Evolutionary and Behavioural Biology*. Edinburgh: Edinburgh University Press. p 242-257.
- Stacey PB. 1986. Group size and foraging efficiency in yellow baboons. *Behavioral Ecology and Sociobiology* 18:175-187.
- Stanford C. 1991. The capped langur in Bangladesh: Behavioral ecology and reproductive tactics. *Contributions to Primatology* 26:1-179.
- Starin ED. 1991. Socioecology of the Red Colobus Monkey in the Gambia with Particular Reference o Female-Male Differences and Transfer Patterns. [Ph.D. thesis]. New York: City University of New York.
- Strier KB. 1987. Demographic patterns in one group of muriquis. *Primate Conservation* 8:73-74.
- Strier KB. 1992. *Faces in the Forest: The Endangered Muriqui Monkeys of Brazil*. Oxford: Oxford University Press.
- Struhsaker TT. 1975. *The Red Colobus Monkey*. Chicago: The University of Chicago Press. xiv, 311 p.
- Struhsaker TT. 1980. Comparison of the behavior and ecology of red colobus and redtail monkeys in the Kibale Forest, Uganda. *African Journal of Ecology* 18:33-51.

- Struhsaker TT, and Leland L. 1979. Socioecology of five sympatric monkey species in the Kibale Forest, Uganda. *Advances in the Study of Behavior* 9:159-228.
- Sussman RW. 1977. Feeding behaviour of Lemur catta and Lemur fulvus. *Primate Ecology: Studies of Feeding and Ranging Behaviour in Lemurs, Monkeys and Apes*. New York: Academic Press. p 1-36.
- Teichroeb JA, Saj TL, Paterson JD, and Sicotte P. 2003. Effect of group size on activity budgets of *Colobus vellerosus* in Ghana. *International Journal of Primatology* 24:743-758.
- Teichroeb JA, and Sicotte P. 2009. Test of the ecological-constraints model on ursine colobus monkeys (*Colobus vellerosus*) in Ghana. *American Journal of Primatology* 71:49-59.
- Thompson-Handler NE. 1990. The Pygmy Chimpanzee: Sociosexual Behaviour, Reproductive Biology and Life History [PhD thesis ]: Yale University.
- van Noordwijk MA, Sauren SEB, Nuzuar, Abulani A/Morrogh-Bernard HC, and Utami Atmoko Ss/van Schaik CP. 2009. Development of independence: Sumatran and Bornean orangutans compared. *Orangutans: Geographic Variation in Behavioral Ecology and Conservation*. New York: Oxford Univ Press. p 189-203.
- van Oijen J. 1992. Sex Differences in Feeding Behaviour of Adult Thomas Langurs [Doctoral thesis]. Utrecht.
- Waser PM. 1976. *Cercocebus albigena*: Site attachment, avoidance and intergroup spacing. *American Naturalist* 110:911-935.
- Watts DP. 1994. The influence of male mating tactics on habitat use in mountain gorillas (*Gorilla gorilla beringei*). *Primates* 35:35-47.
- Watts DP. 1998. Long-term habitat use by mountain gorillas (*Gorilla gorilla beringei*). 1. Consistency, variation, and home range size and stability. *International Journal of Primatology* 19:651-680.
- White FJ. 1992. Activity budgets, feeding behavior, and habitat use of pygmy chimpanzees at Lomako, Zaire. *American Journal of Primatology* 26(3):215-223.
- Whiten A, Byrne RW, and Henzi SP. 1987. The behavioral ecology of mountain baboons. *International Journal of Primatology* 8:367-388.
- Whitten AJ. 1980. The Kloss Gibbon in Siberut Rain Forest [PhD thesis ]. Cambridge: King's College.
- Willems EP, Hellriegel B, and van Schaik CP. 2013. The collective action problem in primate territory economics. *Proceedings of the Royal Society B* 280:20130081.
- Wrangham R. 1977. Feeding behaviour of chimpanzees in Gombe National Park, Tanzania. In: Clutton-Brock TH, editor. *Primate Ecology: Studies of Feeding and Ranging Behaviour in Lemurs, Monkeys and Apes*. New York: Academic Press. p 503-538.
